# Supplementary material for: The endonuclease domain of the LINE-1 ORF2 protein can tolerate multiple mutations
Source: PubMed Central journal article supplement (PMC4837594; doi:10.1186/s13100-016-0064-x), 2016-04-19
Supplement: 13100_2016_64_MOESM2_ESM.pdf [file 13100_2016_64_MOESM2_ESM.pdf]

Tuesday, August 25, 2015 9:15 PM

- Majority

Majority

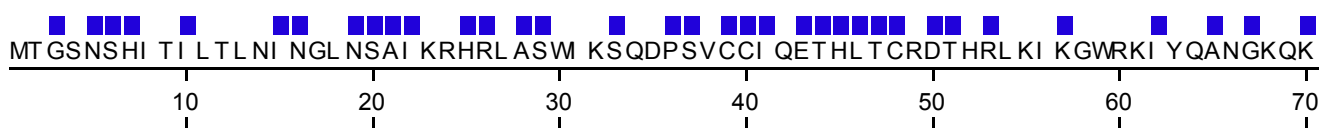

| Sequence    | 10 | 20  | 30  | 40 | 50 | 60 | 70 |
|-------------|----|-----|-----|----|----|----|----|
| ChrX.seq96  |    |     |     |    |    |    | 70 |
| Chr1.seq97  |    | VS. | AP. | N. |    |    | 70 |
| Chr1.seq98  |    |     |     |    |    |    | 70 |
| Chr1.seq99  |    |     |     |    | M. |    | 70 |
| Chr1.seq100 |    |     |     |    |    |    | 70 |
| Chr1.seq101 |    |     | R.  |    |    |    | 70 |
| Chr1.seq102 |    |     |     |    |    |    | 70 |
| Chr1.seq103 |    |     |     |    |    |    | 70 |
| Chr1.seq104 |    |     |     |    |    |    | 70 |
| Chr1.seq105 |    |     | R.  |    |    |    | 70 |
| Chr1.seq106 |    | V.  |     |    |    |    | 70 |
| Chr1.seq107 |    |     |     |    |    |    | 70 |
| Chr1.seq108 |    | V.  | AP. | N. |    | I. | 70 |
| Chr1.seq109 |    |     |     |    |    |    | 70 |
| Chr1.seq110 |    |     |     | Y. |    |    | 70 |
| Chr1.seq111 |    |     |     |    | M. |    | 70 |
| Chr2.seq40  |    | V.  | P.  | N. |    | H. | 70 |
| Chr2.seq41  |    | V.  | P.  | N. |    |    | 70 |
| Chr2.seq42  |    |     |     |    |    |    | 70 |
| Chr2.seq43  |    |     |     |    |    |    | 70 |
| Chr2.seq44  |    |     |     |    |    |    | 70 |
| Chr2.seq45  |    | V.  | P.  |    | M. |    | 70 |
| Chr2.seq46  |    | V.  | AP. |    |    |    | 70 |
| Chr2.seq47  |    |     |     |    |    |    | 70 |
| Chr2.seq48  |    |     |     |    | M. |    | 70 |
| Chr2.seq49  |    |     |     | N. |    |    | 70 |
| Chr3.seq75  |    |     | Y.  |    |    |    | 70 |
| Chr3.seq76  |    | V.  | P.  | N. | Y. |    | R. |
| Chr3.seq77  |    |     |     |    |    |    | 70 |
| Chr3.seq78  |    |     |     |    |    |    | 70 |
| Chr3.seq79  |    |     |     |    |    |    | 70 |
| Chr3.seq82  |    |     |     |    |    |    | 70 |
| Chr3.seq83  |    |     |     |    |    |    | 70 |
| Chr3.seq84  |    |     |     |    |    |    | 70 |
| Chr4.seq23  |    |     |     |    |    |    | 70 |
| Chr4.seq24  |    |     | E.  |    |    |    | 70 |
| Chr4.seq25  |    |     |     | S. | M. |    | 70 |
| Chr4.seq26  |    |     |     |    |    |    | 70 |
| Chr4.seq27  |    |     |     |    |    |    | 70 |
| Chr4.seq28  |    |     |     |    |    |    | 70 |
| Chr4.seq29  |    |     |     |    |    |    | 70 |
| Chr4.seq30  |    |     |     |    |    |    | 70 |
| Chr4.seq31  |    |     |     |    |    |    | 70 |
| Chr4.seq32  |    |     |     |    |    |    | 70 |
| Chr5.seq55  |    |     |     |    |    |    | 70 |
| Chr5.seq56  |    |     |     |    |    |    | 70 |
| Chr5.seq57  |    |     |     |    |    |    | 70 |
| Chr5.seq58  |    |     |     |    |    |    | 70 |
| Chr5.seq59  |    |     |     |    |    |    | 70 |
| Chr5.seq60  |    |     |     |    |    |    | 70 |
| Chr5.seq61  |    |     |     |    |    |    | 70 |
| Chr5.seq63  |    |     |     |    |    |    | 70 |
| Chr5.seq64  |    |     |     |    |    |    | 70 |
| Chr5.seq65  |    | V.  | P.  | N. | V. |    | 70 |



Tuesday, August 25, 2015 9:15 PM

|              |                                                                               |    |
|--------------|-------------------------------------------------------------------------------|----|
| Chr16.seq20  | .....                                                                         | 70 |
| Chr16.seq21  | .....                                                                         | 70 |
| Chr16.seq22  | .....V.....                                                                   | 70 |
| Chr17.seq33  | .....                                                                         | 70 |
| Chr18.seq141 | .....S.....                                                                   | 70 |
| Chr18.seq142 | .....                                                                         | 70 |
| Chr18.seq143 | .....N.....M.....S.....                                                       | 70 |
| Chr18.seq144 | .....M.....                                                                   | 70 |
| Chr18.seq145 | .....K.....V.....P.....                                                       | 70 |
| Chr20.seq131 | .....M.....V.....S.....                                                       | 70 |
| Chr20.seq132 | .....V.....P.....                                                             | 70 |
| Chr22.seq129 | .....                                                                         | 70 |
| Chr22.seq130 | .....S.....                                                                   | 70 |
| ChrX.seq85   | .....                                                                         | 70 |
| ChrX.seq86   | .....                                                                         | 70 |
| ChrX.seq88   | .....                                                                         | 70 |
| ChrX.seq89   | .....                                                                         | 70 |
| ChrX.seq90   | .....                                                                         | 70 |
| ChrX.seq91   | .....M.....                                                                   | 70 |
| ChrX.seq92   | .....                                                                         | 70 |
| L1.3 EN1     | MTGSNSHI TI LTLNI NGLNSAI KRHRLASW KSQDPSVCCI QETHLTCRDTHRLKI KGWRKI YQANGKQK | 70 |

- Majority

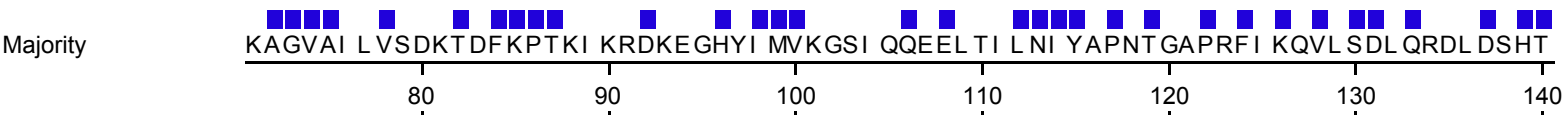

|             |                   |     |
|-------------|-------------------|-----|
| ChrX.seq96  | .....H.....       | 140 |
| Chr1.seq97  | .....             | 140 |
| Chr1.seq98  | .....             | 140 |
| Chr1.seq99  | .....             | 140 |
| Chr1.seq100 | .....             | 140 |
| Chr1.seq101 | .....             | 140 |
| Chr1.seq102 | .....             | 140 |
| Chr1.seq103 | .....             | 140 |
| Chr1.seq104 | .....             | 140 |
| Chr1.seq105 | .....Y.....       | 140 |
| Chr1.seq106 | .....             | 140 |
| Chr1.seq107 | .....T.....       | 140 |
| Chr1.seq108 | .....T.....       | 140 |
| Chr1.seq109 | .....             | 140 |
| Chr1.seq110 | .....             | 140 |
| Chr1.seq111 | .....             | 140 |
| Chr2.seq40  | .....I.....       | 140 |
| Chr2.seq41  | .....M.....       | 140 |
| Chr2.seq42  | .....L.....       | 140 |
| Chr2.seq43  | .....             | 140 |
| Chr2.seq44  | .....             | 140 |
| Chr2.seq45  | .....M.....M..... | 140 |
| Chr2.seq46  | .....             | 140 |
| Chr2.seq47  | .....L.....       | 140 |
| Chr2.seq48  | .....M.....       | 140 |
| Chr2.seq49  | .....             | 140 |
| Chr3.seq75  | .....             | 140 |
| Chr3.seq76  | .....I.....       | 140 |
| Chr3.seq77  | .....             | 140 |
| Chr3.seq78  | .....             | 140 |
| Chr3.seq79  | .....L.....       | 140 |
| Chr3.seq82  | .....H.....       | 140 |



Tuesday, August 25, 2015 9:15 PM

|              |                                                                                 |     |
|--------------|---------------------------------------------------------------------------------|-----|
| Chr11.seq14  | .....I.....                                                                     | 140 |
| Chr11.seq15  | .....                                                                           | 140 |
| Chr12.seq50  | .....Q.....                                                                     | 140 |
| Chr12.seq51  | .....Q.....                                                                     | 140 |
| Chr12.seq52  | ..E.....R..A                                                                    | 140 |
| Chr12.seq53  | .....                                                                           | 140 |
| Chr12.seq54  | .....                                                                           | 140 |
| Chr13.seq126 | .....L.....                                                                     | 140 |
| Chr13.seq127 | ..V.....                                                                        | 140 |
| Chr13.seq128 | .....                                                                           | 140 |
| Chr14.seq138 | .....P.....                                                                     | 140 |
| Chr14.seq139 | .....                                                                           | 140 |
| Chr14.seq140 | .....Q.....Q.....                                                               | 140 |
| Chr15.seq133 | .....                                                                           | 140 |
| Chr15.seq134 | .....                                                                           | 140 |
| Chr15.seq135 | .....                                                                           | 140 |
| Chr15.seq136 | .....Y.....                                                                     | 140 |
| Chr15.seq137 | .....                                                                           | 140 |
| Chr16.seq16  | .....                                                                           | 140 |
| Chr16.seq17  | .....                                                                           | 140 |
| Chr16.seq18  | .....                                                                           | 140 |
| Chr16.seq19  | .....F.....                                                                     | 140 |
| Chr16.seq20  | .....                                                                           | 140 |
| Chr16.seq21  | .....                                                                           | 140 |
| Chr16.seq22  | .....                                                                           | 140 |
| Chr17.seq33  | .....                                                                           | 140 |
| Chr18.seq141 | .....L.....                                                                     | 140 |
| Chr18.seq142 | .....                                                                           | 140 |
| Chr18.seq143 | .....                                                                           | 140 |
| Chr18.seq144 | .....                                                                           | 140 |
| Chr18.seq145 | .....A.....H.....                                                               | 140 |
| Chr20.seq131 | .....                                                                           | 140 |
| Chr20.seq132 | .....                                                                           | 140 |
| Chr22.seq129 | .....A.....                                                                     | 140 |
| Chr22.seq130 | .....                                                                           | 140 |
| ChrX.seq85   | .....                                                                           | 140 |
| ChrX.seq86   | .....H.....                                                                     | 140 |
| ChrX.seq88   | .....H.....                                                                     | 140 |
| ChrX.seq89   | .....                                                                           | 140 |
| ChrX.seq90   | .....                                                                           | 140 |
| ChrX.seq91   | .....D.....                                                                     | 140 |
| ChrX.seq92   | .....                                                                           | 140 |
| L1.3 EN1     | KAGVAI LVSDKTDFKPTKI KRDKEGHYI MVKGSI QQEEL TI LNI YAPNTGAPRFI KQVLSDLQRDL DSHT | 140 |

- Majority

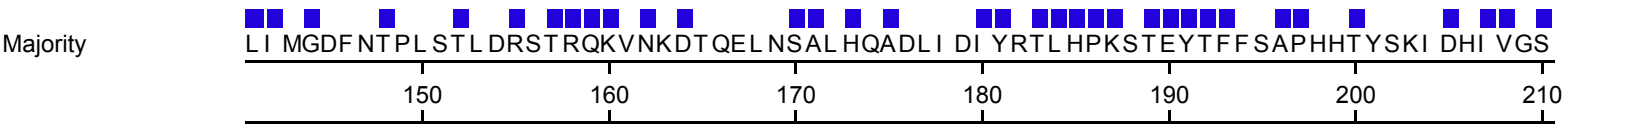

|             |             |     |
|-------------|-------------|-----|
| ChrX.seq96  | .....       | 210 |
| Chr1.seq97  | .....       | 210 |
| Chr1.seq98  | .....       | 210 |
| Chr1.seq99  | .....I..... | 210 |
| Chr1.seq100 | .....H..... | 210 |
| Chr1.seq101 | .....       | 210 |
| Chr1.seq102 | .....       | 210 |
| Chr1.seq103 | .....       | 210 |
| Chr1.seq104 | .....       | 210 |
| Chr1.seq105 | .....       | 210 |





Tuesday, August 25, 2015 9:15 PM

|            |                                                                             |     |
|------------|-----------------------------------------------------------------------------|-----|
| ChrX.seq89 | ..... R.....                                                                | 210 |
| ChrX.seq90 | ..... H.....                                                                | 210 |
| ChrX.seq91 | ..... L.....                                                                | 210 |
| ChrX.seq92 | ..... Y..... A.....                                                         | 210 |
| L1.3 EN1   | LI MGDFNTPLSTLDRSTRQKVNKDTQELNSALHQADLI DI YRTLHPKSTEYTFFSAPHHTYSKI DHI VGS | 210 |

- Majority

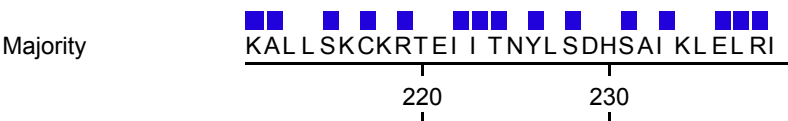

|             |                     |     |
|-------------|---------------------|-----|
| ChrX.seq96  | .....               | 239 |
| Chr1.seq97  | T.....              | 239 |
| Chr1.seq98  | .....               | 239 |
| Chr1.seq99  | .....               | 239 |
| Chr1.seq100 | .....               | 239 |
| Chr1.seq101 | .....               | 239 |
| Chr1.seq102 | .....               | 239 |
| Chr1.seq103 | .....               | 239 |
| Chr1.seq104 | .....               | 239 |
| Chr1.seq105 | .....               | 239 |
| Chr1.seq106 | .....               | 239 |
| Chr1.seq107 | .....               | 239 |
| Chr1.seq108 | .....               | 239 |
| Chr1.seq109 | .....               | 239 |
| Chr1.seq110 | .....               | 239 |
| Chr1.seq111 | .....               | 239 |
| Chr2.seq40  | .....               | 239 |
| Chr2.seq41  | ..... T..... M..... | 239 |
| Chr2.seq42  | .....               | 239 |
| Chr2.seq43  | .....               | 239 |
| Chr2.seq44  | .....               | 239 |
| Chr2.seq45  | ..... E.....        | 239 |
| Chr2.seq46  | .....               | 239 |
| Chr2.seq47  | .....               | 239 |
| Chr2.seq48  | .....               | 239 |
| Chr2.seq49  | .....               | 239 |
| Chr3.seq75  | .....               | 239 |
| Chr3.seq76  | ..... P.....        | 239 |
| Chr3.seq77  | .....               | 239 |
| Chr3.seq78  | .....               | 239 |
| Chr3.seq79  | .....               | 239 |
| Chr3.seq82  | .....               | 239 |
| Chr3.seq83  | .....               | 239 |
| Chr3.seq84  | .....               | 239 |
| Chr4.seq23  | .....               | 239 |
| Chr4.seq24  | .....               | 239 |
| Chr4.seq25  | .....               | 239 |
| Chr4.seq26  | .....               | 239 |
| Chr4.seq27  | .....               | 239 |
| Chr4.seq28  | ..... S.....        | 239 |
| Chr4.seq29  | .....               | 239 |
| Chr4.seq30  | .....               | 239 |
| Chr4.seq31  | .....               | 239 |
| Chr4.seq32  | .....               | 239 |
| Chr5.seq55  | .....               | 239 |
| Chr5.seq56  | .....               | 239 |
| Chr5.seq57  | .....               | 239 |
| Chr5.seq58  | .....               | 239 |





Tuesday, August 25, 2015 9:15 PM

|              |                                  |     |
|--------------|----------------------------------|-----|
| Chr15.seq136 | .....                            | 239 |
| Chr15.seq137 | .....                            | 239 |
| Chr16.seq16  | .....                            | 239 |
| Chr16.seq17  | .....                            | 239 |
| Chr16.seq18  | .....                            | 239 |
| Chr16.seq19  | ..... R. ....                    | 239 |
| Chr16.seq20  | .....                            | 239 |
| Chr16.seq21  | .....                            | 239 |
| Chr16.seq22  | ..... M. ....                    | 239 |
| Chr17.seq33  | .....                            | 239 |
| Chr18.seq141 | ..... V. ....                    | 239 |
| Chr18.seq142 | .....                            | 239 |
| Chr18.seq143 | .....                            | 239 |
| Chr18.seq144 | .....                            | 239 |
| Chr18.seq145 | . T. .... R. .... K. ....        | 239 |
| Chr20.seq131 | .....                            | 239 |
| Chr20.seq132 | .....                            | 239 |
| Chr22.seq129 | .....                            | 239 |
| Chr22.seq130 | .....                            | 239 |
| ChrX.seq85   | .....                            | 239 |
| ChrX.seq86   | .....                            | 239 |
| ChrX.seq88   | ..... R. ....                    | 239 |
| ChrX.seq89   | .....                            | 239 |
| ChrX.seq90   | ..... N. Y. ....                 | 239 |
| ChrX.seq91   | .....                            | 239 |
| ChrX.seq92   | .....                            | 239 |
| L1.3 EN1     | KALLSKCKRTEI I TNYLSDHSAI KLELRI | 239 |

Decoration 'Decoration #1': Hide (as '!') residues that match L1.3 EN1 exactly.
